# Supplementary material for: A Comparative Study of Intramuscular Alfaxalone- or Ketamine-Based Anesthetic Mixtures in Gray Squirrels Undergoing Gonadectomy: Clinical and Physiologic Findings
Source: Animals (Basel). 2020 Aug 12;10(8):1402. doi: 10.3390/ani10081402 (PMC7460254; doi:10.3390/ani10081402)
Supplement: Supplementary file 1 [file animals-10-01402-s001.pdf]

**Table S1.** Demographic characteristics of wild grey squirrels undergoing gonadectomy during pilot study 1 and 2 randomized to receive two anesthetic mixtures IM including ketamine (15 mg/kg) or alfaxalone (4 mg/kg) with different dexmedetomidine doses: alfaxalone-dexmedetomidine 30 µg/kg (group A+30DEX; n=5), ketamine-dexmedetomidine 30 µg/kg (group K+30DEX; n=5), alfaxalone-dexmedetomidine 35 µg/kg (group A+35DEX; n=6) and ketamine-dexmedetomidine 35 µg/kg (group K+35DEX; n=5).

|                           |               | Pilot study 1 (n=10) |           | Pilot study 2 (n=11) |            |
|---------------------------|---------------|----------------------|-----------|----------------------|------------|
|                           |               | A+30DEX              | K+30DEX   | A+35DEX              | K+35DEX    |
| Sex                       | Female (n, %) | 2 (40.0%)            | 1 (20.0%) | 2 (33.3%)            | 3* (60.0%) |
|                           | Male (n, %)   | 3 (60.0%)            | 4 (80.0%) | 4 (66.7%)            | 2 (40.0%)  |
| Body weight (g; mean± SD) |               | 424±105              | 530±45    | 477±92               | 520±45     |
| Age                       | Young         | 2 (40.0%)            | 1 (20.0%) | 4 (66.7%)            | 1 (20.0%)  |
|                           | Adult         | 3 (60.0%)            | 4 (80.0%) | 2 (33.3%)            | 4 (80.0%)  |

\*1 pregnant squirrel.

**Table S2.** Parameters related to the quality of sedation, surgical techniques and recovery phase on wild grey squirrels undergoing gonadectomy during pilot study 1 and 2 randomized to receive two anesthetic mixtures IM including ketamine (15 mg/kg) or alfaxalone (4 mg/kg) with different dexmedetomidine doses: alfaxalone-dexmedetomidine 30 µg/kg (group A+30DEX; n=5), ketamine-dexmedetomidine 30 µg/kg (group K+30DEX; n=5), alfaxalone-dexmedetomidine 35 µg/kg (group A+35DEX; n=6) and ketamine-dexmedetomidine 35 µg/kg (group K+35DEX; n=5). Descriptive statistics: values are numbers and percentages.

| Parameter           |            | Pilot study 1 (n=10) |            | Pilot study 2 (n=11) |            |
|---------------------|------------|----------------------|------------|----------------------|------------|
|                     |            | A+30DEX              | K+30DEX    | A+35DEX              | K+35DEX    |
| Muscle relaxation   | Absent     | 0 (0.0%)             | 0 (0.0%)   | 0 (0.0%)             | 0 (0.0%)   |
|                     | Mild       | 5 (100.0%)           | 3 (60.0%)  | 3 (50.0%)            | 4 (80.0%)  |
|                     | Excellent  | 0 (0.0%)             | 2 (40.0%)  | 3 (50.0%)            | 1 (20.0%)  |
| Depth of anesthesia | Inadequate | 0 (0.0%)             | 0 (0.0%)   | 0 (0.0%)             | 0 (0.0%)   |
|                     | Mild       | 5 (100.0%)           | 3 (60.0%)  | 3 (50.0%)            | 4 (80.0%)  |
|                     | Profound   | 0 (0.0%)             | 2 (40.0%)  | 3 (50.0%)            | 1 (20.0%)  |
| Recovery time       | Poor       | 0 (0.0%)             | 0 (0.0%)   | 2 (33.3%)            | 0 (0.0%)   |
|                     | Good       | 4 (80.0%)            | 1 (20.0%)  | 1 (16.7%)            | 0 (0.0%)   |
|                     | Excellent  | 1 (20.0%)            | 4 (80.0%)  | 3 (50.0%)            | 5 (100.0%) |
| Recovery quality    | Poor       | 1 (20.0%)            | 0 (0.0%)   | 1 (16.7%)            | 0 (0.0%)   |
|                     | Good       | 2 (40.0%)            | 0 (0.0%)   | 3 (50.0%)            | 1 (20.0%)  |
|                     | Excellent  | 2 (40.0%)            | 5 (100.0%) | 2 (33.3%)            | 4 (80.0%)  |

**Table S3.** Effect of the season on basal physiologic parameters of wild grey squirrels undergoing gonadectomy (estimated marginal means ± standard error).

|                         | Season |                       |                      |                      | p value      |
|-------------------------|--------|-----------------------|----------------------|----------------------|--------------|
|                         | Winter | Spring                | Summer               | Fall                 |              |
| RR_basal                | 102±11 | 100±13                | 121±14               | 89±11                | 0.338        |
| HR_basal                | 242±12 | 244 <sup>ab</sup> ±12 | 225 <sup>a</sup> ±13 | 273 <sup>b</sup> ±10 | <b>0.022</b> |
| SpO <sub>2</sub> _basal | 98±1   | 98±1                  | 97±1                 | 96±1                 | 0.587        |
| T_basal                 | 38±1   | 38±1                  | 38±1                 | 38±1                 | 0.936        |

For each row, values followed by the same superscript letter do not differ significantly ( $p < 0.05$ ).
